# Supplementary material
Source: Research Square preprint supplement (doi:10.21203/rs.3.rs-9297032/v1)
Supplement: Supplementary file 1 [file 4252124acda5d95c38220d7d.docx]

## Table S1 Primers used in the study

| Primer name | Usage | Sequence (5'-3') | Product Length (bp) |
| --- | --- | --- | --- |
| CmoCh03G013920-gDNA | Gene amplification | CAGAGTCCCCATCGAAGGTATA | 1115 |
| CCGTTTTGTATTCCCACCAGG |
| CmoCh03G013920-RT | RT- qPCR | GGGGAACATACAGACCCACA | 287 |
| TCCCCCTCTGCTAAAACCTG |
| CmoEF1a | RT- qPCR | ACGGTGATGCTGGTATGGTTA | 211 |
| CATTGTTGTTGGTTGGCTTATT |
| Cp4.1LG10g05910 -pro | Promoter  Amplification | gacggtatcgataagcttGTAGATCTCGGCGTCTGCTCT | 2100 |
| tctagaactagtggatccGGCGGCTTATAGAATCAAAGCGTT |
| CmoCh03G013920-pro | Promoter  Amplification | gacggtatcgataagcttTCTGTCCGTCACAAACTGCG | 2091 |
| tctagaactagtggatccGGCGGCTTATAGAATGAAAGCGT |

## Table S2 Differentially expressed genes within the *Sd-1* mapping region

| ID | 400E_fpkm | 400M_fpkm | 408E_fpkm | 408M_fpkm | 21037E_fpkm | 21037M_fpkm | Description |
| --- | --- | --- | --- | --- | --- | --- | --- |
| CmoCh03G013880 | 6.65 | 5.38 | 6.36 | 6.37 | 3.53 | 3.53 | unnamed protein product [Linum tenue] |
| **CmoCh03G013920** | **2.99** | **2.08** | **4.87** | **1.68** | **0.24** | **0.24** | **gibberellin 2-beta-dioxygenase [Cucurbita moschata]** |
| CmoCh03G013940 | 5.68 | 3.11 | 5.06 | 3.18 | 6.19 | 6.19 | glucan endo-1,3-beta-glucosidase 11-like [Cucurbita moschata] |
| CmoCh03G013950 | 17.58 | 16.79 | 16.22 | 20.87 | 11.46 | 11.46 | uncharacterized protein LOC111433180 [Cucurbita moschata] |
| CmoCh03G014000 | 0.24 | 0.39 | 0.50 | 0.25 | 4.21 | 4.21 | protein TIFY 5A [Cucurbita moschata] |

Note: 400E and 400M, early-stage and mid-stage of dwarf NIL; 408E and 408M, early-stage and mid-stage of dwarf NIL; 400E and 400M, early-stage and mid-stage of dwarf NIL; 21037E and 21037M, early-stage and mid-stage of long-vine line D205.

## Table S3 Differentially accumulated metabolites between different lines

| **Index** | **Compounds** | **Class** | **400E** | **400M** | **408E** | **408M** | **21037E** | **21037M** |
| --- | --- | --- | --- | --- | --- | --- | --- | --- |
| **ABA** | **Abscisic acid** | **ABA** | **8.903** | **49.844** | **11.363** | **87.284** | **10.272** | **41.723** |
| IAA-Trp | Indole-3-acetyl-L-tryptophan | Auxin | 0.000 | 0.000 | 0.000 | 0.121 | 0.000 | 0.000 |
| IAA-Val-Me | Indole-3-acetyl-L-valine methyl ester | Auxin | 0.014 | 0.034 | 0.032 | 0.000 | 0.007 | 0.026 |
| IAA-Glu | Indole-3-acetyl glutamic acid | Auxin | 0.295 | 0.860 | 0.000 | 0.000 | 0.334 | 0.653 |
| OxIAA | 2-oxindole-3-acetic acid | Auxin | 2.042 | 0.000 | 0.000 | 40.407 | 0.000 | 0.000 |
| ILA | Indole-3-lactic acid | Auxin | 0.000 | 0.000 | 0.000 | 1.190 | 0.000 | 1.224 |
| ICAld | Indole-3-carboxaldehyde | Auxin | 0.000 | 0.000 | 0.000 | 0.634 | 0.000 | 0.000 |
| TRA | Tryptamine | Auxin | 0.041 | 0.201 | 0.176 | 0.000 | 0.054 | 0.000 |
| **IAA** | **Indole-3-acetic acid** | **Auxin** | **14.173** | **15.311** | **16.129** | **27.832** | **12.994** | **14.198** |
| IAA-Asp | Indole-3-acetyl-L-aspartic acid | Auxin | 6.858 | 14.235 | 1.068 | 2.154 | 6.107 | 11.230 |
| IAN | 3-Indoleacetonitrile | Auxin | 0.418 | 0.431 | 0.487 | 0.636 | 0.423 | 0.478 |
| MEIAA | Methyl indole-3-acetate | Auxin | 0.566 | 0.565 | 0.720 | 0.909 | 0.496 | 0.568 |
| Indole | Indole | Auxin | 130.200 | 2030.489 | 2014.263 | 16312.932 | 156.068 | 1787.980 |
| TRP | L-tryptophan | Auxin | 1483.719 | 5028.975 | 7665.243 | 54654.650 | 1561.737 | 4466.587 |
| iP7G | N6-Isopentenyl-adenine-7-glucoside | CK | 0.298 | 0.883 | 0.640 | 0.940 | 0.348 | 0.748 |
| **tZR** | **trans-Zeatin riboside** | **CK** | **1.388** | **0.365** | **0.600** | **1.370** | **0.779** | **0.489** |
| **tZ** | **trans-Zeatin** | **CK** | **0.283** | **0.245** | **0.341** | **0.459** | **0.245** | **0.227** |
| cZR | cis-Zeatin riboside | CK | 0.000 | 0.422 | 0.000 | 0.528 | 0.000 | 0.401 |
| pTR | para-Topolin riboside | CK | 0.045 | 0.533 | 0.133 | 0.368 | 0.050 | 0.521 |
| 2CltZ | 2-Chloro-trans-zeatin | CK | 0.000 | 0.000 | 0.000 | 0.067 | 0.000 | 0.000 |
| DHZROG | Dihydrozeatin-O-glucoside riboside | CK | 0.011 | 0.046 | 0.012 | 0.055 | 0.000 | 0.003 |
| cZROG | cis-Zeatin-O-glucoside riboside | CK | 0.169 | 0.274 | 0.000 | 0.000 | 0.000 | 0.239 |
| tZRMP | 9-Ribosyl-trans-zeatin 5'-monophosphate | CK | 14.704 | 5.430 | 9.383 | 21.704 | 11.487 | 7.279 |
| IPR | N6-isopentenyladenosine | CK | 0.226 | 0.190 | 0.319 | 0.476 | 0.190 | 0.318 |
| iP9G | N6-Isopentenyl-adenine-9-glucoside | CK | 0.000 | 0.000 | 0.000 | 0.557 | 0.000 | 0.000 |
| IP | N6-isopentenyladenine | CK | 0.072 | 0.080 | 0.101 | 0.125 | 0.071 | 0.095 |
| 2MeScZ | 2-Methylthio-cis-zeatin | CK | 0.000 | 0.045 | 0.000 | 0.000 | 0.000 | 0.000 |
| 2MeScZR | 2-Methylthio-cis-zeatin riboside | CK | 0.000 | 0.023 | 0.025 | 0.107 | 0.000 | 0.029 |
| iPRMP | N-6-iso-pentenyladenosine-5'-monophosphate | CK | 5.642 | 4.044 | 7.273 | 9.683 | 5.454 | 4.926 |
| **ACC** | **1-Aminocyclopropanecarboxylic acid** | **ETH** | **66.668** | **88.366** | **119.506** | **248.089** | **51.103** | **76.343** |
| GA29 | Gibberellin A29 | GA | 13.170 | 29.449 | 18.087 | 39.765 | 11.443 | 22.727 |
| GA24 | Gibberellin A24 | GA | 3.095 | 0.760 | 3.612 | 2.422 | 2.349 | 0.934 |
| GA15 | Gibberellin A15 | GA | 4.286 | 1.038 | 5.516 | 5.008 | 3.323 | 1.434 |
| GA34 | Gibberellin A34 | GA | 3.949 | 2.380 | 5.230 | 6.852 | 2.693 | 1.984 |
| GA51 | Gibberellin A51 | GA | 11.522 | 0.000 | 9.600 | 9.230 | 0.000 | 0.000 |
| GA9 | Gibberellin A9 | GA | 0.368 | 0.000 | 0.401 | 0.525 | 0.000 | 0.000 |
| GA7 | Gibberellin A7 | GA | 0.034 | 0.035 | 0.000 | 0.000 | 0.000 | 0.000 |
| **GA4** | **Gibberellin A4** | **GA** | **0.000** | **0.000** | **0.000** | **1.451** | **0.000** | **0.000** |
| **JA** | **Jasmonic acid** | **JA** | **7.655** | **16.857** | **5.842** | **12.602** | **11.158** | **9.176** |
| JA-ILE | Jasmonoyl-L-isoleucine | JA | 0.464 | 2.412 | 0.364 | 1.480 | 0.874 | 1.243 |
| OPDA | cis(+)-12-Oxophytodienoic acid | **JA** | 7.086 | 10.881 | 8.600 | 16.726 | 9.958 | 5.120 |
| OPC-4 | 3-oxo-2-(2-(Z)-Pentenyl) cyclopentane-1-butyric acid | JA | 3.837 | 7.293 | 0.000 | 6.609 | 6.856 | 0.000 |
| JA-Phe | N-[(-)-Jasmonoyl]-(l)-phenalanine | **JA** | 0.000 | 0.007 | 0.084 | 0.037 | 0.006 | 0.052 |
| JA-Val | N-[(-)-Jasmonoyl]-(L)-valine | JA | 0.000 | 0.091 | 0.000 | 0.042 | 0.005 | 0.041 |
| **SA** | **Salicylic acid** | **SA** | **59.591** | **210.100** | **167.757** | **236.987** | **50.119** | **403.526** |
| Phe | L-Phenylalanine | SA | 1871.297 | 2531.680 | 3106.068 | 3102.680 | 1763.988 | 2977.720 |
| 2-Coumarate | 2-Coumarate | SA | 19.993 | 0.000 | 0.000 | 0.000 | 17.558 | 0.000 |
| MeSAG | 2-Methoxycarbonylphenyl beta-D-glucopyranoside | SA | 0.000 | 254.079 | 54.999 | 372.768 | 0.000 | 273.925 |
| t-CA | trans-Cinnamic acid | SA | 0.000 | 0.000 | 0.000 | 91.294 | 0.000 | 0.000 |
| SAG | Salicylic acid 2-O-β-glucoside | SA | 299.885 | 31499.289 | 52178.732 | 62421.385 | 332.801 | 62055.419 |

## Table S4 DEGs associated with SA pathway, IAA pathway and cell wall modification

| ID | Name | Predictive function | 400E | **400M** | 408E | **408M** | 21037E | 21037M |
| --- | --- | --- | --- | --- | --- | --- | --- | --- |
| CmoCh18G005190 | NPR1 | SA perception and defense-Related | 3.17 | **6.82** | 3.29 | **7.14** | 3.29 | 7.14 |
| CmoCh11G004110 | PR1 | Defense-Related | 55.00 | 48.34 | 67.03 | 60.54 | 34.97 | 23.75 |
| CmoCh11G004120 | PR1 | Defense-Related | 4.38 | 2.97 | 6.91 | 4.13 | 1.48 | 4.66 |
| CmoCh19G005420 | PR1 | Defense-Related | 0.21 | 1.67 | 0.46 | 8.63 | 2.05 | 0.51 |
| CmoCh02G003350 | SAUR23 | Auxin responsive | 2.55 | **1.01** | 3.04 | **3.30** | 4.99 | 3.64 |
| CmoCh03G001110 | SAUR32 | Auxin responsive | 2.17 | **1.83** | 3.65 | **4.55** | 3.20 | 2.62 |
| CmoCh20G007870 | SAUR24 | Auxin responsive | 2.21 | **1.36** | 1.91 | **3.38** | 3.49 | 4.19 |
| CmoCh20G007840 | SAUR24 | Auxin responsive | 0.54 | **0.68** | 0.58 | **1.45** | 0.95 | 1.40 |
| CmoCh20G007770 | SAUR23 | Auxin responsive | 3.08 | **2.78** | 3.69 | **5.56** | 5.96 | 6.43 |
| CmoCh19G010930 | XTH1 | Xylan modification (cell wall rigidification) | 85.28 | **195.64** | 36.13 | **81.06** | 52.51 | 196.63 |
| CmoCh19G010940 | XTH1 | Xylan modification (cell wall rigidification) | 25.14 | **38.19** | 11.00 | **13.30** | 12.04 | 22.84 |
| CmoCh19G010950 | XTH1 | Xylan modification (cell wall rigidification) | 17.74 | **19.53** | 5.76 | **5.20** | 4.57 | 5.41 |
| CmoCh04G009080 | XTH6 | Xylan modification (cell wall loosening) | 313.58 | **44.48** | 337.85 | **123.08** | 280.85 | 45.36 |
| CmoCh16G007900 | XTH6 | Xylan modification (cell wall loosening) | 230.75 | **154.16** | 263.52 | **332.57** | 165.21 | 57.38 |


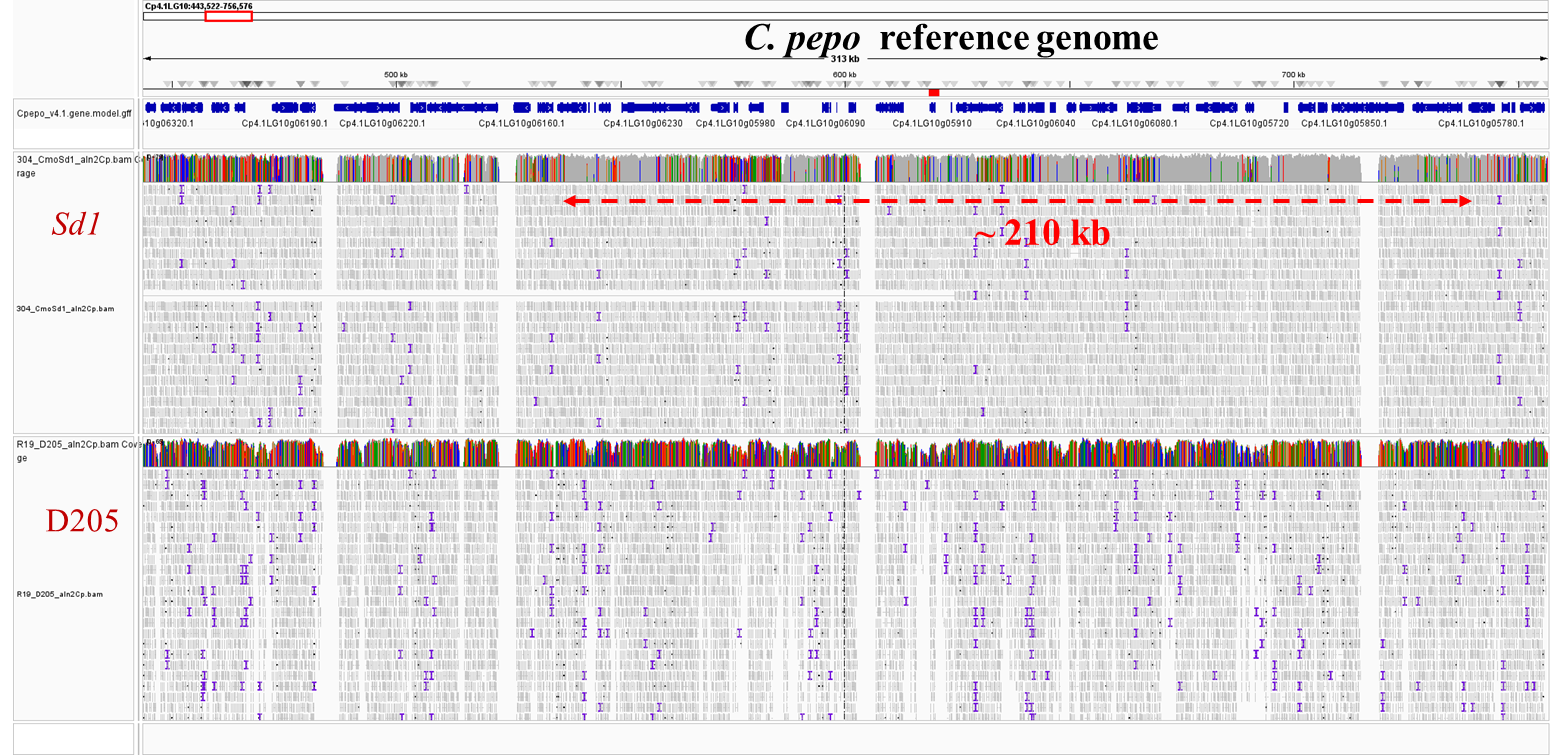


## Fig. S1 IGV visualization of *Sd1* and D205 align to *C. pepo* reference genome


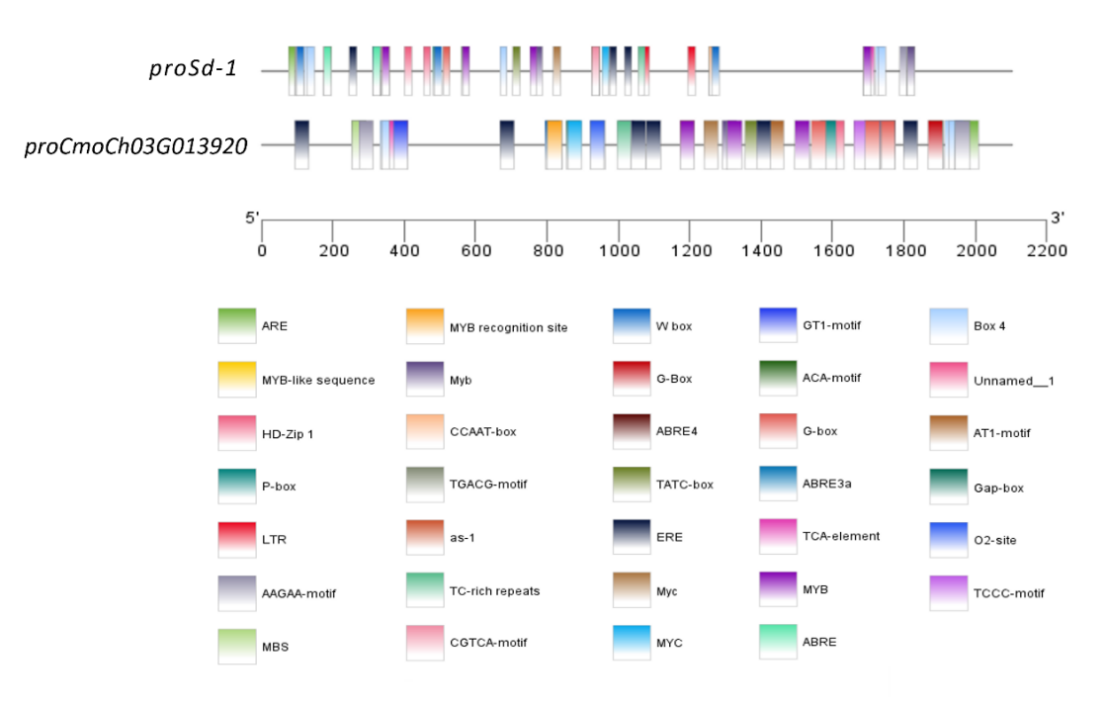


## Fig. S2 cis-acting elements in the *Sd-1* and CmoCh03G013920 putative promoter region.


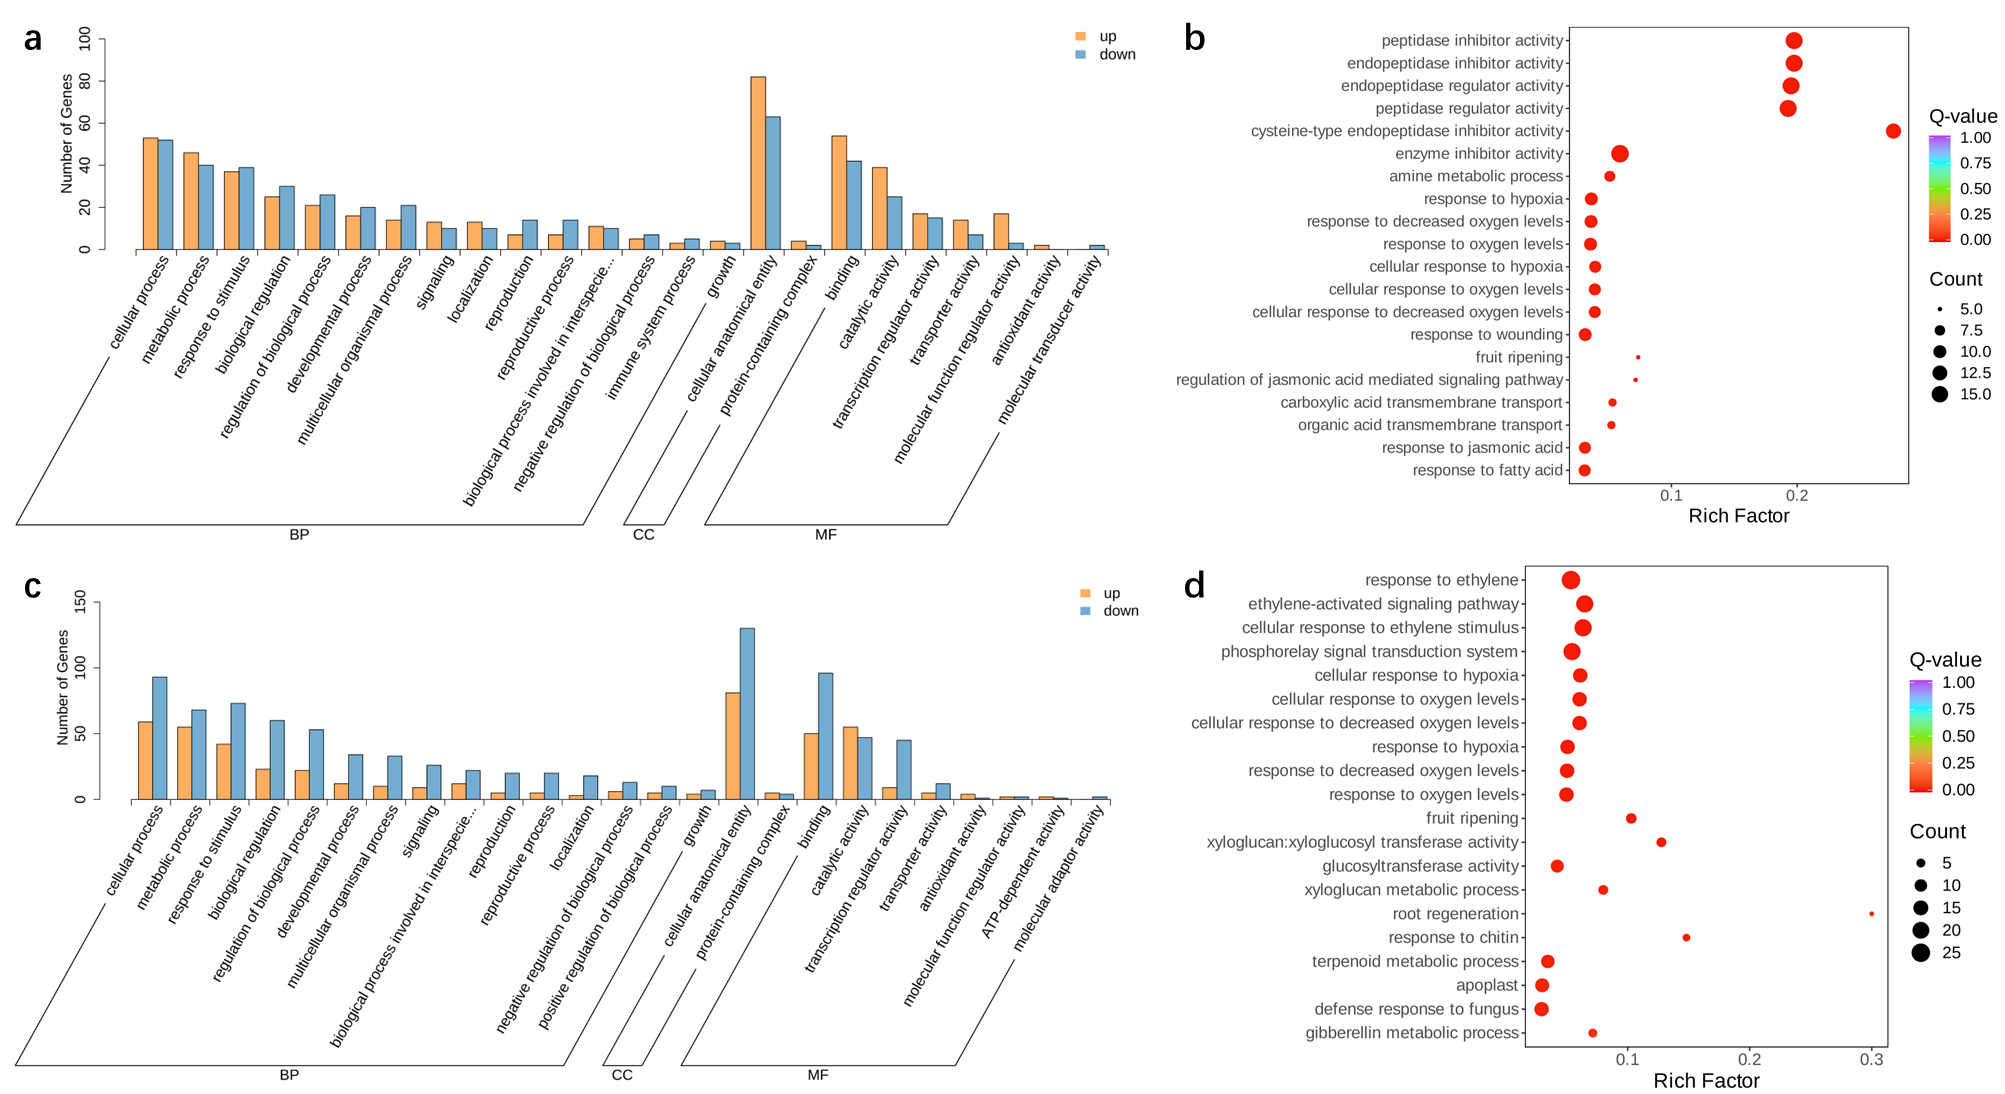


## Fig. S3 GO enrichment of DEGs between semi-dwarf and dwarf NILs at the early (**a-b**) and mid (**c-d**) stages.
